# Supplementary material for: Direct Flux Control for Stand-Alone Operation Brushless Doubly Fed Induction Generator Using Resonant-Based Sliding-Mode Control Approach
Source: Preprints.org preprint supplement (doi:10.20944/preprints201802.0058.v1), 2018-02-07
Supplement: Supplementary file 1 [file supplementary]

The photo of experimental test rig system is shown as follows:

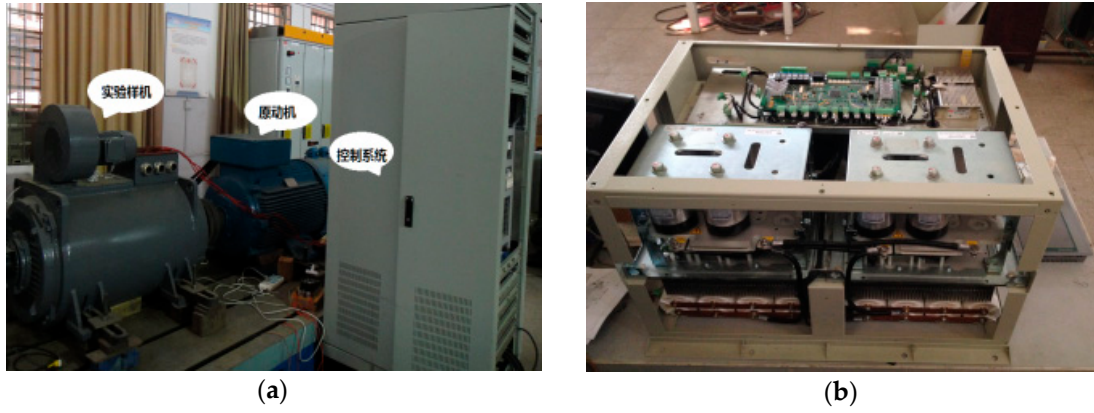

**Figure .** The photo of the experimental test rig system: (a) The experimental platform and power control cabinet; (b) The converter module and its controller.
